# Supplementary material
Source: publisher figshare collection journal article supplement (https://geolsoc.figshare.com/ndownloader/files/5426324)
Supplement: Supplementary file 1 [file 5426324]

Sample_ID	Codea	Age	Grain_IDb	Ptc	Zoned	SiO2	TiO2	Al2O3	Fe2O3	FeO	MnO	MgO	CaO	Na2O	K2O	Cr2O3	NiO	P2O5	Total	EN	FS	WO	Mg#	Si	Ti	Al(IV)	Al(VI)	Al	Fe3+	Fe2+	Mn	Mg	Ca	Na	K	Cr	Ni	P
2H-4-113-114	3	0.55	10	58	r	52.08	0.23	0.56	0.77	25.49	1.05	18.58	1.65	0.15	0.00	0.04	0.00		100.61	0.53	0.42	0.02	56.5	1.975	0.000	0.018	0.000	0.025	0.022	0.808	0.034	1.050	0.067	0.000	0.000	0.001	0.000
2H-4-113-114	3	0.55	10	59	r	51.70	0.25	0.60	0.56	25.88	1.20	18.12	1.59	0.12	0.01	0.01	0.03		100.08	0.52	0.43	0.02	55.5	1.976	0.007	0.011	0.003	0.027	0.016	0.827	0.039	1.032	0.065	0.001	0.000	0.000	0.001
2H-4-113-114	3	0.55	10	60		51.52	0.20	0.53	0.79	25.99	1.13	17.92	1.62	0.13	0.00	0.01	0.04		99.88	0.51	0.43	0.02	55.1	1.975	0.000	0.018	0.000	0.024	0.023	0.833	0.037	1.024	0.067	0.000	0.000	0.000	0.001
2H-4-113-114	3	0.55	10	61	c	51.61	0.22	0.48	0.30	26.16	1.08	18.04	1.57	0.10	0.01	0.03	0.00		99.60	0.52	0.44	0.03	55.1	1.982	0.003	0.009	0.004	0.022	0.009	0.840	0.035	1.033	0.065	0.004	0.000	0.001	0.000
2H-4-113-114	3	0.55	10	62	c	51.38	0.21	0.51	0.80	25.83	1.22	17.88	1.57	0.14	0.01	0.03	0.00		99.58	0.51	0.44	0.02	55.2	1.976	0.000	0.017	0.000	0.023	0.023	0.831	0.040	1.025	0.065	0.000	0.000	0.001	0.000
2H-4-113-114	3	0.55	13	67	r	50.95	0.21	0.53	0.00	28.03	1.40	16.09	1.56	0.15	0.01	0.03	0.04		99.00	0.47	0.48	0.03	50.6	1.991	0.000	0.003	0.015	0.024	0.000	0.916	0.046	0.937	0.065	0.015	0.000	0.001	0.001
2H-4-113-114	3	0.55	13	68		51.00	0.19	0.54	0.49	28.08	1.44	16.19	1.55	0.16	0.01	0.01	0.00		99.66	0.47	0.48	0.02	50.7	1.981	0.002	0.012	0.006	0.025	0.014	0.912	0.047	0.937	0.065	0.004	0.000	0.000	0.000
2H-4-113-114	3	0.55	13	69		51.07	0.23	0.59	0.15	28.34	1.29	16.38	1.52	0.10	0.00	0.04	0.02		99.74	0.47	0.48	0.02	50.7	1.981	0.003	0.009	0.008	0.027	0.004	0.919	0.042	0.947	0.063	0.004	0.000	0.001	0.001
2H-4-113-114	3	0.55	13	70		50.85	0.17	0.53	1.09	27.62	1.35	16.42	1.54	0.15	0.01	0.00	0.01		99.74	0.47	0.47	0.02	51.4	1.973	0.000	0.019	0.000	0.024	0.032	0.896	0.044	0.950	0.064	0.000	0.000	0.000	0.000
2H-4-113-114	3	0.55	13	71		51.21	0.14	0.49	0.53	27.93	1.35	16.47	1.55	0.15	0.01	0.02	0.00		99.84	0.48	0.47	0.02	51.2	1.983	0.003	0.010	0.005	0.022	0.015	0.904	0.044	0.950	0.064	0.001	0.000	0.001	0.000
2H-4-113-114	3	0.55	13	72	c	51.27	0.20	0.53	0.24	28.00	1.33	16.52	1.54	0.15	0.01	0.00	0.00		99.78	0.48	0.47	0.03	51.3	1.985	0.000	0.010	0.009	0.024	0.007	0.906	0.044	0.953	0.064	0.007	0.000	0.000	0.000
2H-4-113-114	3	0.55	13	73	c	54.06	0.22	2.10	0.00	25.18	1.22	14.70	1.60	0.44	0.14	0.00	0.00		99.66	0.42	0.43	0.02	51.0	2.090	0.006	0.000	0.096	0.096	0.000	0.814	0.040	0.847	0.066	0.037	0.007	0.000	0.000
2H-4-113-114	3	0.55	13	74		51.03	0.20	0.47	0.84	27.81	1.29	16.47	1.55	0.14	0.03	0.01	0.00		99.84	0.48	0.47	0.02	51.3	1.977	0.005	0.010	0.000	0.021	0.025	0.901	0.042	0.951	0.064	0.001	0.001	0.000	0.000
2H-4-113-114	3	0.55	13	75		51.33	0.22	0.45	0.79	28.03	1.36	16.43	1.57	0.17	0.02	0.04	0.03		100.44	0.47	0.47	0.02	51.1	1.978	0.002	0.012	0.000	0.020	0.023	0.903	0.044	0.944	0.065	0.005	0.001	0.001	0.001
2H-4-113-114	3	0.55	13	76		51.12	0.16	0.44	0.42	28.22	1.33	16.34	1.56	0.12	0.01	0.00	0.00		99.71	0.47	0.48	0.03	50.8	1.984	0.002	0.009	0.004	0.020	0.012	0.916	0.044	0.945	0.065	0.002	0.000	0.000	0.000
2H-4-113-114	3	0.55	13	77	r	51.04	0.17	0.42	0.17	26.91	1.35	17.02	1.54	0.13	0.00	0.00	0.00		98.75	0.49	0.46	0.03	53.0	1.988	0.000	0.007	0.007	0.019	0.005	0.876	0.045	0.988	0.064	0.008	0.000	0.000	0.000
2H-4-113-114	3	0.55	23	97	r	50.58	0.21	0.54	0.23	27.50	1.45	16.25	1.56	0.14	0.01	0.02	0.06		98.55	0.47	0.48	0.03	51.3	1.983	0.000	0.011	0.008	0.025	0.007	0.902	0.048	0.950	0.066	0.007	0.001	0.001	0.002
2H-4-113-114	3	0.55	23	98	r	50.71	0.19	0.53	0.63	28.71	1.57	15.56	1.60	0.15	0.01	0.04	0.00		99.70	0.45	0.49	0.02	49.1	1.978	0.005	0.011	0.003	0.024	0.019	0.937	0.052	0.905	0.067	0.001	0.000	0.001	0.000
2H-4-113-114	3	0.55	23	99		50.63	0.20	0.56	1.45	27.76	1.46	16.15	1.60	0.14	0.00	0.03	0.00		99.97	0.47	0.47	0.02	50.9	1.965	0.000	0.020	0.000	0.026	0.042	0.901	0.048	0.934	0.067	0.000	0.000	0.001	0.000
2H-4-113-114	3	0.55	23	100	c	51.03	0.17	0.55	1.12	28.06	1.41	16.32	1.58	0.11	0.02	0.03	0.00		100.40	0.47	0.48	0.02	50.9	1.970	0.000	0.020	0.000	0.025	0.033	0.906	0.046	0.939	0.065	0.000	0.001	0.001	0.000
2H-4-113-114	3	0.55	23	101	c	51.08	0.17	0.48	1.61	27.06	1.43	16.74	1.54	0.19	0.01	0.00	0.00		100.31	0.48	0.46	0.01	52.4	1.968	0.004	0.013	0.000	0.022	0.047	0.872	0.047	0.961	0.064	0.001	0.000	0.000	0.000
2H-4-113-114	3	0.55	60	11	r	51.09	0.23	0.56	0.04	27.22	1.15	16.89	1.57	0.16	0.02	0.00	0.00		98.92	0.49	0.46	0.03	52.5	1.986	0.000	0.007	0.012	0.026	0.001	0.885	0.038	0.979	0.065	0.012	0.001	0.000	0.000
2H-4-113-114	3	0.55	60	12		51.23	0.23	0.56	0.34	27.05	1.18	17.08	1.63	0.15	0.00	0.00	0.00		99.44	0.49	0.46	0.03	53.0	1.981	0.000	0.012	0.007	0.026	0.010	0.875	0.039	0.985	0.068	0.007	0.000	0.000	0.000
2H-4-113-114	3	0.55	60	13	c	51.30	0.20	0.56	0.87	26.21	1.04	17.71	1.61	0.13	0.00	0.01	0.03		99.67	0.51	0.44	0.02	54.6	1.974	0.000	0.020	0.000	0.025	0.025	0.843	0.034	1.016	0.066	0.000	0.000	0.000	0.001
2H-4-113-114	3	0.55	60	14		51.48	0.15	0.54	1.10	26.20	1.18	17.71	1.55	0.15	0.01	0.03	0.02		100.12	0.51	0.44	0.02	54.6	1.973	0.000	0.020	0.000	0.024	0.032	0.840	0.038	1.012	0.064	0.000	0.000	0.001	0.001
2H-4-113-114	3	0.55	60	15		51.31	0.20	0.62	0.82	25.75	1.21	17.85	1.60	0.14	0.01	0.03	0.02		99.55	0.51	0.43	0.02	55.3	1.973	0.000	0.021	0.001	0.028	0.024	0.828	0.039	1.023	0.066	0.000	0.000	0.001	0.001
2H-4-113-114	3	0.55	60	16	r	50.96	0.22	0.52	0.61	27.01	1.27	16.86	1.66	0.13	0.02	0.00	0.00		99.26	0.49	0.46	0.02	52.7	1.978	0.005	0.010	0.002	0.024	0.018	0.877	0.042	0.975	0.069	0.001	0.001	0.000	0.000
2H-4-113-114	3	0.55	61	17	r	51.67	0.22	0.53	0.59	25.76	1.21	18.13	1.54	0.15	0.00	0.03	0.02		99.85	0.52	0.43	0.02	55.6	1.978	0.004	0.012	0.002	0.024	0.017	0.825	0.039	1.035	0.063	0.003	0.000	0.001	0.001
2H-4-113-114	3	0.55	61	18		51.33	0.23	0.56	1.02	25.76	1.18	17.97	1.54	0.13	0.01	0.04	0.00		99.76	0.51	0.43	0.02	55.4	1.970	0.000	0.019	0.000	0.025	0.029	0.827	0.038	1.028	0.063	0.000	0.000	0.001	0.000
2H-4-113-114	3	0.55	61	19		51.58	0.24	0.59	0.98	25.66	1.17	18.13	1.57	0.15	0.01	0.02	0.00		100.10	0.52	0.43	0.02	55.7	1.971	0.000	0.020	0.000	0.027	0.028	0.820	0.038	1.033	0.064	0.000	0.000	0.001	0.000
2H-4-113-114	3	0.55	61	20	c	51.73	0.22	0.59	0.49	25.86	1.08	18.13	1.57	0.15	0.02	0.02	0.02		99.88	0.52	0.43	0.02	55.5	1.979	0.003	0.011	0.006	0.027	0.014	0.827	0.035	1.034	0.064	0.003	0.001	0.001	0.001
2H-4-113-114	3	0.55	61	21	c	51.70	0.20	0.58	0.72	25.71	1.09	18.20	1.60	0.15	0.00	0.02	0.00		99.97	0.52	0.43	0.02	55.8	1.976	0.000	0.018	0.002	0.026	0.021	0.822	0.035	1.037	0.066	0.000	0.000	0.001	0.000
2H-4-113-114	3	0.55	61	22	c	51.76	0.22	0.54	0.45	25.91	1.17	18.15	1.56	0.14	0.00	0.00	0.00		99.89	0.52	0.43	0.02	55.5	1.980	0.002	0.011	0.005	0.024	0.013	0.829	0.038	1.035	0.064	0.004	0.000	0.000	0.000
2H-4-113-114	3	0.55	62	23	r	58.47	0.21	4.22	0.00	20.79	1.02	12.49	1.68	1.03	0.28	0.00	0.03		100.22	0.36	0.35	0.01	51.7	2.235	0.006	0.000	0.190	0.190	0.000	0.665	0.033	0.712	0.069	0.062	0.014	0.000	0.001
2H-4-113-114	3	0.55	62	24	r	50.74	0.19	0.46	1.32	25.88	1.42	16.79	2.21	0.16	0.00	0.03	0.03		99.23	0.49	0.44	0.03	53.6	1.970	0.004	0.012	0.000	0.021	0.039	0.840	0.047	0.972	0.092	0.002	0.000	0.001	0.001
2H-4-113-114	3	0.55	62	25		51.08	0.19	0.51	0.35	26.96	1.49	16.93	1.54	0.13	0.01	0.04	0.00		99.24	0.49	0.46	0.02	52.8	1.982	0.002	0.010	0.005	0.023	0.010	0.875	0.049	0.979	0.064	0.003	0.000	0.001	0.000
2H-4-113-114	3	0.55	62	26		51.26	0.16	0.49	0.14	27.23	1.35	16.98	1.48	0.14	0.01	0.00	0.00		99.24	0.49	0.46	0.03	52.6	1.988	0.000	0.008	0.010	0.022	0.004	0.883	0.044	0.981	0.061	0.007	0.000	0.000	0.000
2H-4-113-114	3	0.55	62	27	c	51.28	0.21	0.51	0.63	27.27	1.33	16.98	1.54	0.14	0.00	0.02	0.00		99.91	0.49	0.46	0.02	52.6	1.978	0.005	0.011	0.001	0.023	0.018	0.880	0.043	0.976	0.064	0.001	0.000	0.001	0.000
2H-4-113-114	3	0.55	62	28	c	51.70	0.25	1.45	0.85	22.54	0.81	20.00	1.93	0.12	0.00	0.01	0.01		99.68	0.56	0.37	0.02	61.3	1.953	0.000	0.040	0.017	0.065	0.024	0.712	0.026	1.126	0.078	0.000	0.000	0.000	0.000
2H-4-113-114	3	0.55	67	55		51.74	0.20	0.55	0.70	25.66	1.14	18.29	1.48	0.16	0.00	0.01	0.00		99.93	0.52	0.43	0.02	56.0	1.978	0.005	0.012	0.002	0.025	0.020	0.820	0.037	1.042	0.061	0.001	0.000	0.000	0.000
2H-4-113-114	3	0.55	67	56	c	51.63	0.18	0.56	1.37	25.10	1.13	18.40	1.59	0.17	0.01	0.01	0.00		100.16	0.52	0.42	0.02	56.6	1.969	0.000	0.020	0.000	0.025	0.039	0.801	0.037	1.046	0.065	0.000	0.000	0.000	0.000
2H-4-113-114	3	0.55	67	57	c	51.45	0.25	0.54	0.57	25.74	1.01	18.22	1.54	0.11	0.00	0.00	0.03		99.46	0.52	0.43	0.02	55.8	1.976	0.006	0.010	0.001	0.024	0.016	0.827	0.033	1.043	0.063	0.001	0.000	0.000	0.001
2H-4-113-114	3	0.55	68	63	c	51.97	0.21	0.58	0.14	26.16	1.14	18.00	1.63	0.18	0.00	0.01	0.01		100.03	0.51	0.44	0.03	55.1	1.985	0.000	0.009	0.012	0.026	0.004	0.836	0.037	1.025	0.067	0.010	0.000	0.000	0.000
2H-4-113-114	3	0.55	68	64	r	50.81	0.22	0.63	0.94	24.22	1.06	18.40	1.65	0.15	0.02	0.00	0.00		98.09	0.53	0.41	0.02	57.5	1.972	0.000	0.022	0.000	0.029	0.027	0.786	0.035	1.064	0.069	0.000	0.001	0.000	0.000
2H-4-113-114	3	0.55	71	90	c	54.88	0.12	0.97	0.57	13.14	0.34	27.35	2.13	0.16	0.00	0.06	0.03		99.75	0.73	0.20	0.03	78.8	1.973	0.000	0.023	0.014	0.041	0.015	0.395	0.010	1.466	0.082	0.000	0.000	0.002	0.001
2H-4-113-114	3	0.55	71	91	r	54.44	0.17	1.74	0.77	12.88	0.38	27.30	2.11	0.13	0.00	0.13	0.02		100.08	0.73	0.20	0.02	79.1	1.951	0.000	0.045	0.024	0.073	0.021	0.386	0.012	1.458	0.081	0.000	0.000	0.004	0.001
2H-4-113-114	3	0.55	2a	1/2		50.58	0.17	0.42	0.32	27.63	1.29	16.29	1.56	0.13	0.02	0.01	0.00		98.42	0.48	0.48	0.03	51.2	1.986	0.000	0.009	0.005	0.019	0.009	0.907	0.043	0.953	0.066	0.005	0.001	0.000	0.000
2H-4-113-114	3	0.55	70a	78	r	51.51	0.24	0.82	0.47	24.84	0.96	18.66	1.67	0.13	0.00	0.00	0.00		99.30	0.53	0.41	0.02	57.2	1.973	0.000	0.020	0.010	0.037	0.014	0.795	0.031	1.065	0.069	0.000	0.000	0.000	0.000
2H-4-113-114	3	0.55	70a	79	c	51.40	0.28	0.70	0.84	25.64	1.14	18.08	1.60	0.14	0.00	0.01	0.00		99.82	0.52	0.43	0.02	55.7	1.969	0.000	0.023	0.001	0.032	0.024	0.821	0.037	1.032	0.066	0.000	0.000	0.000	0.000
2H-4-113-114	3	0.55	70a	80	c	51.68	0.26	0.53	0.46	25.31	1.13	18.43	1.55	0.15	0.00	0.00	0.05		99.55	0.53	0.42	0.03	56.5	1.980	0.001	0.012	0.003	0.024	0.013	0.811	0.037	1.052	0.064	0.007	0.000	0.000	0.002
2H-4-113-114	3	0.55	70b	81	c	51.27	0.19	0.43	1.10	27.73	1.48	16.47	1.57	0.17	0.01	0.01	0.07		100.50	0.47	0.47	0.02	51.4	1.975	0.002	0.012	0.000	0.020	0.032	0.893	0.048	0.946	0.065	0.003	0.000	0.000	0.002
2H-4-113-114	3	0.55	70b	82	r	50.79	0.21	0.51	0.87	27.78	1.56	16.26	1.58	0.12	0.00	0.02	0.00		99.70	0.47	0.48	0.02	51.1	1.974	0.000	0.017	0.000	0.023	0.025	0.903	0.051	0.942	0.066	0.000	0.000	0.001	0.000
2H-4-113-114	3	0.55	70c	83		51.23	0.17	0.51	0.13	27.33	1.20	16.96	1.53	0.13	0.02	0.00	0.02		99.22	0.49	0.46	0.03	52.5	1.987	0.000	0.008	0.010	0.023	0.004	0.886	0.039	0.980	0.064	0.006	0.001	0.000	0.001
2H-4-113-114	3	0.55	70c	84		51.14	0.17	0.50	0.10	27.28	1.21	16.95	1.54	0.13	0.00	0.02	0.01		99.05	0.49	0.46	0.03	52.5	1.987	0.000	0.008	0.010	0.023	0.003	0.886	0.040	0.982	0.064	0.007	0.000	0.001	0.000
11X-3-0-1	19	2.84	18	28		54.08	0.31	1.95	0.00	23.52	1.07	17.40	1.92	0.37	0.04	0.01	0.03	0.00	100.70	0.49	0.39	0.03	56.9	2.041	0.009	0.000	0.087	0.087	0.000	0.742	0.034	0.979	0.078	0.041	0.002	0.000	0.001	0.000
11X-3-0-1	19	2.84	18	29		51.57	0.28	0.66	0.57	24.90	1.18	18.41	1.84	0.14	0.00	0.02	0.00	0.00	99.58	0.53	0.42	0.03	56.9	1.974	0.006	0.012	0.003	0.030	0.017	0.797	0.038	1.050	0.075	0.002	0.000	0.001	0.000	0.000
11X-3-0-1	19	2.84	18	30		51.68	0.28	0.69	0.18	25.47	1.22	18.23	1.82	0.11	0.00	0.01	0.01	0.00	99.70	0.52	0.43	0.03	56.1	1.978	0.003	0.011	0.009	0.031	0.005	0.815	0.040	1.040	0.075	0.005	0.000	0.000	0.000	0.000
11X-3-0-1	19	2.84	19	54	c	51.69	0.28	0.76	1.45	24.27	1.21	18.83	1.84	0.13	0.03	0.03	0.01	0.03	100.57	0.53	0.40	0.02	58.0	1.958	0.000	0.026	0.000	0.034	0.041	0.769	0.039	1.063	0.075	0.000	0.001	0.001	0.000	0.001
11X-3-0-1	19	2.84	19	55	r	51.49	0.25	0.71	0.89	24.10	1.17	18.75	1.83	0.16	0.00	0.00	0.07	0.03	99.45	0.53	0.40	0.02	58.1	1.968	0.000	0.024	0.000	0.032	0.026	0.770	0.038	1.068	0.075	0.000	0.000	0.000	0.002	0.001
11X-3-0-1	19	2.84	19	56	r	51.76	0.24	0.68	0.71	24.04	1.15	19.09	1.84	0.11	0.01	0.03	0.00	0.01	99.67	0.54	0.40	0.02	58.6	1.971	0.000	0.022	0.002	0.031	0.020	0.766	0.037	1.084	0.075	0.000	0.000	0.001	0.000	0.000
11X-3-0-1	19	2.84	20	45	r	52.88	0.24	1.52	1.75	17.77	0.58	23.69	1.72	0.15	0.01	0.02	0.00	0.03	100.35	0.65	0.28	0.01	70.4	1.940	0.000	0.053	0.006	0.066	0.048	0.545	0.018	1.296	0.068	0.000	0.000	0.001	0.000	0.001
11X-3-0-1	19	2.84	21	35	c	51.44	0.23	0.60	0.91	25.05	1.31	18.14	1.76	0.15	0.02	0.00	0.00	0.00	99.61	0.52	0.42	0.02	56.3	1.973	0.000	0.020	0.000	0.027	0.026	0.803	0.043	1.037	0.072	0.000	0.001	0.000	0.000	0.000
11X-3-0-1	19	2.84	21	36	r	51.61	0.22	0.58	0.85	24.30	1.18	18.58	1.87	0.18	0.00	0.03	0.07	0.00	99.48	0.53	0.41	0.03	57.7	1.975	0.006	0.013	0.001	0.026	0.025	0.778	0.038	1.060	0.077	0.000	0.000	0.001	0.002	0.000
11X-3-0-1	19	2.84	21	37		51.27	0.27	0.54	1.07	24.77	1.23	18.28	1.77	0.14	0.01	0.01	0.01	0.00	99.37	0.52	0.42	0.02	56.8	1.970	0.005	0.012	0.000	0.024	0.031	0.796	0.040	1.047	0.073	0.003	0.000	0.000	0.000	0.000
11X-3-0-1	19	2.84	21	38		51.38	0.27	0.59	1.40	24.23	1.17	18.64	1.86	0.14	0.01	0.02	0.00	0.01	99.72	0.53	0.41	0.02	57.8	1.963	0.007	0.012	0.000	0.027	0.040	0.774	0.038	1.062	0.076	0.001	0.000	0.001	0.000	0.000
11X-3-0-1	19	2.84	23	57	c	51.52	0.30	0.79	1.41	24.27	1.17	18.75	1.91	0.11	0.00	0.01	0.05	0.00	100.29	0.53	0.40	0.02	57.9	1.957	0.000	0.027	0.000	0.035	0.040	0.771	0.038	1.062	0.078	0.000	0.000	0.000	0.002	0.000
11X-3-0-1	19	2.84	23	58	r	51.77	0.29	0.67	0.85	23.81	1.19	19.20	1.79	0.13	0.01	0.02	0.00	0.00	99.74	0.54	0.40	0.02	59.0	1.969	0.000	0.022	0.000	0.030	0.024	0.758	0.038	1.089	0.073	0.000	0.000	0.001	0.000	0.000
11X-3-0-1	19	2.84	24	39	c	51.17	0.29	0.71	0.79	23.62	1.18	18.89	1.84	0.14	0.00	0.00	0.00	0.02	98.65	0.54	0.40	0.02	58.8	1.968	0.000	0.023	0.001	0.032	0.023	0.760	0.038	1.083	0.076	0.000	0.000	0.000	0.000	0.001
11X-3-0-1	19	2.84	24	40	c	51.85	0.29	0.70	0.29	24.08	1.11	19.17	1.78	0.13	0.01	0.00	0.00	0.01	99.42	0.54	0.40	0.03	58.7	1.976	0.004	0.012	0.008	0.031	0.008	0.767	0.036	1.089	0.073	0.005	0.000	0.000	0.000	0.000
11X-3-0-1	19	2.84	20a	47	c	52.66	0.21	0.97	1.25	19.98	0.67	22.21	1.69	0.17	0.00	0.00	0.00	0.02	99.84	0.62	0.32	0.01	66.5	1.960	0.000	0.034	0.003	0.043	0.035	0.622	0.021	1.232	0.067	0.000	0.000	0.000	0.000	0.001
11X-3-0-1	19	2.84	20a	48	c	52.73	0.21	0.96	1.62	19.74	0.67	22.46	1.67	0.14	0.00	0.02	0.00	0.00	100.22	0.62	0.32	0.02	67.0	1.955	0.000	0.036	0.000	0.042	0.045	0.612	0.021	1.241	0.066	0.000	0.000	0.001	0.000	0.000
11X-3-0-1	19	2.84	20a	49	r	52.47	0.22	1.05	1.75	19.82	0.75	22.17	1.71	0.15	0.00	0.03	0.02	0.03	100.18	0.61	0.32	0.02	66.6	1.950	0.000	0.040	0.000	0.046	0.049	0.616	0.024	1.228	0.068	0.000	0.000	0.001	0.001	0.001
11X-3-0-1	19	2.84	20a	50	r	52.58	0.21	1.04	1.26	20.13	0.66	22.19	1.67	0.13	0.01	0.04	0.00	0.03	99.96	0.62	0.32	0.01	66.3	1.957	0.000	0.038	0.002	0.046	0.035	0.626	0.021	1.231	0.067	0.000	0.000	0.001	0.000	0.001
11X-3-0-1	19	2.84	23a	59	c	51.51	0.31	0.69	1.05	24.06	1.11	18.93	1.75	0.16	0.01	0.02	0.00	0.03	99.63	0.54	0.40	0.02	58.4	1.965	0.008	0.014	0.000	0.031	0.030	0.767	0.036	1.076	0.072	0.000	0.000	0.001	0.000	0.001
19X-2-24-26	45	6.03	23	34		53.59	0.18	1.49	1.46	15.36	0.39	25.41	2.03	0.13	0.00	0.04	0.00	0.00	100.08	0.69	0.24	0.01	74.7	1.947	0.000	0.048	0.011	0.064	0.040	0.467	0.012	1.376	0.079	0.000	0.000	0.001	0.000	0.000
19X-2-24-26	45	6.03	23	35		53.67	0.20	1.48	1.65	15.50	0.44	25.41	2.00	0.12	0.00	0.02	0.00	0.00	100.50	0.69	0.24	0.01	74.5	1.944	0.000	0.050	0.008	0.063	0.045	0.470	0.014	1.372	0.078	0.000	0.000	0.001	0.000	0.000
19X-2-24-26	45	6.03	23	36		53.74	0.16	1.43	1.68	15.46	0.42	25.44	2.01	0.13	0.00	0.05	0.00	0.00	100.52	0.69	0.24	0.01	74.6	1.946	0.000	0.050	0.007	0.061	0.046	0.468	0.013	1.373	0.078	0.000	0.000	0.001	0.000	0.000
19X-2-24-26	45	6.03	23	37	c	53.76	0.19	1.35	1.65	15.57	0.41	25.49	1.94	0.11	0.01	0.01	0.01	0.00	100.51	0.69	0.24	0.01	74.5	1.947	0.000	0.047	0.005	0.058	0.045	0.472	0.013	1.376	0.075	0.000	0.000	0.000	0.000	0.000
19X-2-24-26	45	6.03	26	7	r	53.79	0.16	1.56	2.31	14.98	0.43	25.72	2.00	0.14	0.02	0.01	0.00	0.03	101.14	0.69	0.23	0.01	75.4	1.935	0.000	0.060	0.001	0.066	0.062	0.451	0.013	1.379	0.077	0.000	0.001	0.000	0.000	0.001
19X-2-24-26	45	6.03	26	8	c	54.09	0.13	1.10	1.19	15.83	0.41	25.54	1.95	0.12	0.00	0.02	0.00	0.01	100.39	0.69	0.25	0.02	74.2	1.960	0.000	0.036	0.007	0.047	0.033	0.480	0.013	1.380	0.076	0.000	0.000	0.001	0.000	0.000
19X-2-24-26	45	6.03	26	9	c	53.59	0.21	1.70	1.93	15.39	0.47	25.08	2.37	0.14	0.01	0.05	0.05	0.03	101.02	0.67	0.24	0.01	74.4	1.935	0.000	0.059	0.007	0.072	0.053	0.465	0.014	1.350	0.092	0.000	0.000	0.001	0.001	0.001
19X-2-24-26	45	6.03	26	10	r	53.52	0.21	1.47	2.07	15.12	0.44	25.48	2.05	0.13	0.02	0.00	0.02	0.05	100.58	0.69	0.24	0.01	75.0	1.937	0.000	0.057	0.000	0.063	0.056	0.458	0.013	1.375	0.080	0.000	0.001	0.000	0.001	0.002
19X-2-24-26	45	6.03	24b	3		54.44	0.18	1.28	1.83	13.18	0.34	27.19	2.06	0.14	0.01	0.01	0.04	0.04	100.73	0.72	0.20	0.01	78.6	1.947	0.000	0.048	0.001	0.054	0.049	0.394	0.010	1.449	0.079	0.000	0.000	0.000	0.001	0.001
19X-2-24-26	45	6.03	24b	4		54.23	0.14	1.29	2.49	12.98	0.42	27.13	1.97	0.14	0.02	0.03	0.04	0.03	100.91	0.72	0.20	0.01	78.8	1.939	0.000	0.051	0.000	0.054	0.067	0.388	0.013	1.446	0.075	0.000	0.001	0.001	0.001	0.001
19X-2-24-26	45	6.03	24b	5		54.46	0.11	1.30	1.40	13.54	0.44	26.88	2.10	0.13	0.01	0.04	0.00	0.00	100.41	0.72	0.21	0.02	78.0	1.955	0.000	0.042	0.010	0.055	0.038	0.407	0.013	1.438	0.081	0.000	0.000	0.001	0.000	0.000
19X-2-24-26	45	6.03	24b	6	r	54.40	0.16	1.31	1.85	13.67	0.42	26.88	2.01	0.13	0.01	0.03	0.04	0.03	100.95	0.72	0.21	0.01	77.8	1.946	0.000	0.050	0.001	0.055	0.050	0.409	0.013	1.433	0.077	0.000	0.000	0.001	0.001	0.001
21X-2-84-86	52	7.23	32	52		53.50	0.23	1.99	2.18	15.30	0.40	25.55	1.86	0.12	0.00	0.03	0.00		101.16	0.69	0.24	0.00	74.9	1.926	0.000	0.068	0.010	0.084	0.059	0.461	0.012	1.371	0.072	0.000	0.000	0.001	0.000
21X-2-84-86	52	7.23	32	53		53.88	0.19	1.38	2.34	13.84	0.46	26.30	2.20	0.13	0.00	0.05	0.00		100.76	0.70	0.22	0.02	77.2	1.938	0.000	0.053	0.000	0.058	0.063	0.416	0.014	1.410	0.085	0.000	0.000	0.001	0.000
21X-2-84-86	52	7.23	32	54		53.09	0.26	2.31	2.46	14.56	0.41	25.55	2.03	0.12	0.01	0.03	0.02		100.85	0.69	0.23	0.00	75.8	1.914	0.000	0.078	0.013	0.098	0.067	0.439	0.013	1.373	0.078	0.000	0.000	0.001	0.001
21X-2-84-86	52	7.23	32	55		53.31	0.24	1.99	2.42	14.60	0.46	25.28	2.54	0.12	0.01	0.03	0.00		101.00	0.68	0.23	0.01	75.5	1.922	0.000	0.071	0.007	0.085	0.066	0.440	0.014	1.359	0.098	0.000	0.000	0.001	0.000
21X-2-84-86	52	7.23	33	44		51.25	0.20	0.53	1.19	26.34	1.02	17.36	1.95	0.14	0.00	0.02	0.00		100.00	0.50	0.44	0.03	54.0	1.970	0.000	0.018	0.000	0.024	0.034	0.847	0.033	0.995	0.080	0.000	0.000	0.001	0.000
21X-2-84-86	52	7.23	34	47	r	51.04	0.21	0.84	1.70	25.57	1.00	17.69	1.92	0.14	0.00	0.00	0.00		100.11	0.51	0.43	0.02	55.2	1.956	0.000	0.032	0.000	0.038	0.049	0.819	0.032	1.010	0.079	0.000	0.000	0.000	0.000
21X-2-84-86	52	7.23	34	48		50.94	0.26	1.05	1.41	24.96	0.91	18.01	1.94	0.14	0.01	0.02	0.00		99.65	0.51	0.42	0.02	56.3	1.954	0.000	0.039	0.001	0.047	0.041	0.801	0.030	1.029	0.080	0.000	0.000	0.001	0.000
21X-2-84-86	52	7.23	34	49		51.16	0.25	0.94	1.75	25.18	0.96	18.07	1.83	0.15	0.00	0.01	0.00		100.31	0.51	0.42	0.02	56.1	1.952	0.000	0.035	0.000	0.042	0.050	0.803	0.031	1.028	0.075	0.000	0.000	0.000	0.000
21X-2-84-86	52	7.23	34	50		51.35	0.23	0.79	0.88	26.06	1.00	17.74	1.84	0.12	0.00	0.02	0.01		100.04	0.51	0.43	0.02	54.8	1.967	0.000	0.026	0.003	0.036	0.025	0.835	0.032	1.013	0.076	0.000	0.000	0.001	0.000
21X-2-84-86	52	7.23	35	56		52.38	0.30	1.21	1.82	20.93	0.76	21.38	1.94	0.12	0.02	0.03	0.00		100.88	0.59	0.34	0.01	64.6	1.944	0.000	0.045	0.000	0.053	0.051	0.650	0.024	1.183	0.077	0.000	0.001	0.001	0.000
21X-2-84-86	52	7.23	35	57		52.57	0.22	1.08	1.73	20.19	0.69	22.02	1.76	0.14	0.00	0.00	0.02		100.42	0.61	0.32	0.02	66.0	1.951	0.000	0.041	0.000	0.047	0.048	0.627	0.022	1.218	0.070	0.000	0.000	0.000	0.001
21X-2-84-86	52	7.23	37	65	c	52.89	0.23	1.47	1.81	18.29	0.55	23.18	2.06	0.14	0.00	0.02	0.00		100.64	0.63	0.29	0.01	69.3	1.942	0.000	0.052	0.005	0.064	0.050	0.562	0.017	1.268	0.081	0.000	0.000	0.001	0.000
21X-2-84-86	52	7.23	37	66	r	52.59	0.30	2.55	3.02	15.65	0.45	24.33	2.25	0.16	0.02	0.05	0.00		101.37	0.66	0.24	0.00	73.5	1.902	0.000	0.090	0.010	0.109	0.082	0.473	0.014	1.311	0.087	0.000	0.001	0.001	0.000
21X-2-84-86	52	7.23	37	67		53.06	0.17	1.41	2.53	14.91	0.48	25.20	2.06	0.13	0.00	0.02	0.05		100.02	0.68	0.23	0.02	75.1	1.935	0.000	0.056	0.000	0.061	0.070	0.455	0.015	1.369	0.080	0.000	0.000	0.001	0.001
21X-2-84-86	52	7.23	37	68		53.86	0.17	1.30	1.94	15.18	0.52	25.62	2.01	0.13	0.00	0.04	0.01		100.78	0.69	0.24	0.01	75.1	1.945	0.000	0.050	0.001	0.055	0.053	0.458	0.016	1.379	0.078	0.000	0.000	0.001	0.000
21X-3-0-2	54A	7.27	21	132		52.89	0.19	1.51	1.53	18.00	0.65	23.69	1.57	0.11	0.00	0.00	0.01		100.15	0.65	0.29	0.00	70.1	1.945	0.000	0.050	0.010	0.065	0.042	0.554	0.020	1.298	0.062	0.000	0.000	0.000	0.000
21X-3-0-2	54A	7.27	21	133		52.74	0.25	0.94	1.12	21.23	0.92	21.61	1.64	0.11	0.00	0.04	0.00		100.60	0.60	0.34	0.01	64.5	1.960	0.000	0.033	0.001	0.041	0.031	0.660	0.029	1.197	0.065	0.000	0.000	0.001	0.000
21X-3-0-2	54A	7.27	21	134		52.53	0.23	1.00	0.88	21.28	0.92	21.36	1.63	0.14	0.00	0.00	0.00		99.97	0.60	0.35	0.02	64.1	1.964	0.000	0.029	0.008	0.044	0.025	0.665	0.029	1.190	0.065	0.000	0.000	0.000	0.000
21X-3-0-2	54A	7.27	21	135		53.11	0.19	1.41	1.71	17.73	0.66	23.98	1.50	0.12	0.02	0.02	0.00		100.45	0.65	0.28	0.00	70.7	1.945	0.000	0.050	0.006	0.061	0.047	0.543	0.020	1.309	0.059	0.000	0.001	0.001	0.000
21X-3-0-2	54A	7.27	22	136		53.05	0.20	1.37	1.49	17.57	0.73	23.84	1.57	0.16	0.02	0.00	0.00		100.00	0.65	0.28	0.01	70.7	1.950	0.000	0.044	0.010	0.059	0.041	0.540	0.023	1.306	0.062	0.000	0.001	0.000	0.000
21X-3-0-2	54A	7.27	22	137		52.64	0.24	1.04	0.98	21.44	0.94	21.20	1.72	0.15	0.01	0.01	0.06		100.43	0.59	0.35	0.02	63.8	1.962	0.000	0.031	0.008	0.046	0.028	0.668	0.030	1.178	0.069	0.000	0.000	0.000	0.002
21X-3-0-2	54A	7.27	22	138		53.03	0.22	0.82	1.37	19.58	0.83	22.65	1.66	0.15	0.00	0.00	0.00		100.31	0.62	0.32	0.02	67.3	1.962	0.000	0.030	0.000	0.036	0.038	0.606	0.026	1.249	0.066	0.000	0.000	0.000	0.000
25X-4-111-113	68	9.76	40	7	c	52.81	0.14	0.50	0.98	21.00	1.40	21.65	1.34	0.12	0.00	0.00	0.00	0.00	99.94	0.60	0.35	0.02	64.8	1.976	0.000	0.018	0.000	0.022	0.028	0.657	0.044	1.207	0.054	0.000	0.000	0.000	0.000	0.000
25X-4-111-113	68	9.76	40	8	c	52.93	0.16	0.48	1.43	20.79	1.51	21.86	1.24	0.13	0.00	0.04	0.00	0.02	100.59	0.61	0.35	0.01	65.2	1.968	0.000	0.017	0.000	0.021	0.040	0.647	0.048	1.212	0.049	0.000	0.000	0.001	0.000	0.001
25X-4-111-113	68	9.76	40	9		52.92	0.13	0.50	1.15	20.90	1.33	21.87	1.20	0.13	0.00	0.00	0.03	0.00	100.17	0.61	0.35	0.01	65.1	1.974	0.000	0.018	0.000	0.022	0.032	0.652	0.042	1.216	0.048	0.000	0.000	0.000	0.001	0.000
25X-4-111-113	68	9.76	40	10	r	53.00	0.14	0.69	0.89	21.05	1.25	21.97	1.22	0.10	0.01	0.03	0.01	0.02	100.38	0.61	0.35	0.01	65.0	1.971	0.000	0.025	0.001	0.030	0.025	0.655	0.039	1.218	0.049	0.000	0.000	0.001	0.000	0.001
25X-4-111-113	68	9.76	41	11	c	52.94	0.19	0.67	0.36	21.71	1.40	21.52	1.17	0.11	0.00	0.02	0.02	0.02	100.14	0.60	0.36	0.01	63.9	1.978	0.000	0.017	0.007	0.029	0.010	0.678	0.044	1.198	0.047	0.000	0.000	0.001	0.001	0.001
25X-4-111-113	68	9.76	41	12	c	52.68	0.17	0.64	1.54	20.90	1.51	21.56	1.22	0.14	0.00	0.00	0.08	0.00	100.44	0.60	0.35	0.01	64.8	1.965	0.000	0.023	0.000	0.028	0.043	0.652	0.048	1.198	0.049	0.000	0.000	0.000	0.002	0.000
25X-4-111-113	68	9.76	41	13		52.50	0.21	0.83	1.23	21.35	1.44	21.37	1.21	0.12	0.00	0.03	0.00	0.02	100.31	0.60	0.36	0.01	64.1	1.962	0.000	0.031	0.000	0.037	0.035	0.667	0.046	1.190	0.048	0.000	0.000	0.001	0.000	0.001
25X-4-111-113	68	9.76	41	14		52.85	0.15	0.57	1.54	20.66	1.47	21.90	1.22	0.12	0.00	0.05	0.03	0.00	100.56	0.61	0.34	0.01	65.4	1.965	0.000	0.021	0.000	0.025	0.043	0.643	0.046	1.214	0.049	0.000	0.000	0.001	0.001	0.000
25X-4-111-113	68	9.76	42	16	c	52.82	0.17	0.66	1.70	21.17	1.39	21.72	1.18	0.11	0.00	0.00	0.00	0.00	100.92	0.60	0.35	0.01	64.6	1.961	0.000	0.024	0.000	0.029	0.047	0.657	0.044	1.202	0.047	0.000	0.000	0.000	0.000	0.000
25X-4-111-113	68	9.76	42	17		52.65	0.13	0.53	1.08	22.52	1.48	20.76	1.12	0.13	0.01	0.01	0.01	0.01	100.44	0.58	0.38	0.01	62.2	1.974	0.000	0.020	0.000	0.023	0.031	0.706	0.047	1.160	0.045	0.000	0.000	0.000	0.000	0.000
25X-4-111-113	68	9.76	42	18	r	53.14	0.14	0.56	0.65	21.36	1.39	21.79	1.13	0.13	0.01	0.03	0.00	0.01	100.35	0.60	0.35	0.01	64.5	1.979	0.000	0.017	0.003	0.025	0.018	0.665	0.044	1.209	0.045	0.000	0.000	0.001	0.000	0.000
25X-4-111-113	68	9.76	43	23		52.54	0.18	0.63	1.93	20.68	1.48	21.69	1.20	0.14	0.00	0.03	0.00	0.02	100.52	0.60	0.35	0.01	65.1	1.958	0.000	0.023	0.000	0.028	0.054	0.645	0.047	1.205	0.048	0.000	0.000	0.001	0.000	0.001
25X-4-111-113	68	9.76	43	24		52.84	0.17	0.65	0.93	21.72	1.38	21.35	1.22	0.13	0.03	0.00	0.01	0.05	100.48	0.59	0.36	0.01	63.7	1.971	0.000	0.024	0.000	0.029	0.026	0.678	0.044	1.187	0.049	0.000	0.001	0.000	0.000	0.002
25X-4-111-113	68	9.76	43	25		52.68	0.16	0.70	1.63	21.12	1.50	21.46	1.25	0.14	0.00	0.00	0.04	0.02	100.70	0.60	0.35	0.01	64.4	1.961	0.000	0.026	0.000	0.031	0.046	0.658	0.047	1.191	0.050	0.000	0.000	0.000	0.001	0.001
25X-4-111-113	68	9.76	46	34	c	52.73	0.16	0.57	1.91	20.73	1.53	21.72	1.25	0.12	0.00	0.00	0.05	0.00	100.77	0.60	0.35	0.01	65.1	1.961	0.000	0.021	0.000	0.025	0.054	0.645	0.048	1.204	0.050	0.000	0.000	0.000	0.001	0.000
25X-4-111-113	68	9.76	46	35		53.06	0.14	0.58	0.70	21.49	1.35	21.69	1.19	0.11	0.00	0.02	0.02	0.00	100.35	0.60	0.36	0.01	64.3	1.977	0.000	0.019	0.003	0.025	0.020	0.670	0.043	1.205	0.048	0.000	0.000	0.001	0.001	0.000
25X-4-111-113	68	9.76	46	36	r	52.70	0.14	0.55	0.61	21.04	1.34	21.70	1.16	0.13	0.00	0.03	0.00	0.01	99.41	0.61	0.35	0.01	64.8	1.979	0.000	0.017	0.003	0.024	0.017	0.661	0.043	1.215	0.047	0.000	0.000	0.001	0.000	0.000
25X-4-111-113	68	9.76	48	40	r	52.54	0.23	0.83	1.89	21.31	1.04	21.27	1.58	0.15	0.00	0.01	0.04	0.00	100.89	0.59	0.35	0.01	64.0	1.954	0.000	0.030	0.000	0.036	0.053	0.663	0.033	1.179	0.063	0.000	0.000	0.000	0.001	0.000
25X-4-111-113	68	9.76	48	41		52.59	0.15	0.76	1.97	21.31	1.03	21.34	1.59	0.12	0.03	0.00	0.03	0.04	100.96	0.59	0.35	0.01	64.1	1.955	0.000	0.029	0.000	0.033	0.055	0.662	0.032	1.182	0.063	0.000	0.001	0.000	0.001	0.001
25X-4-111-113	68	9.76	48	43		52.59	0.17	0.74	1.64	21.40	1.03	21.31	1.48	0.16	0.00	0.00	0.00	0.01	100.52	0.59	0.35	0.01	64.0	1.961	0.000	0.028	0.000	0.033	0.046	0.667	0.033	1.185	0.059	0.000	0.000	0.000	0.000	0.000
25X-4-111-113	68	9.76	48	44	c	52.34	0.23	0.78	1.66	21.00	1.11	21.23	1.55	0.17	0.02	0.00	0.00	0.00	100.09	0.59	0.35	0.01	64.3	1.960	0.000	0.028	0.000	0.034	0.047	0.657	0.035	1.185	0.062	0.000	0.001	0.000	0.000	0.000
25X-4-111-113	68	9.76	48	45		52.47	0.18	0.84	1.72	21.28	0.94	21.29	1.54	0.16	0.01	0.00	0.00	0.01	100.44	0.59	0.35	0.01	64.1	1.958	0.000	0.032	0.000	0.037	0.048	0.664	0.030	1.184	0.062	0.000	0.000	0.000	0.000	0.000
25X-4-111-113	68	9.76	48	47		52.57	0.22	0.82	1.82	21.13	1.02	21.42	1.56	0.15	0.00	0.01	0.03	0.00	100.74	0.59	0.34	0.01	64.4	1.956	0.000	0.030	0.000	0.036	0.051	0.657	0.032	1.188	0.062	0.000	0.000	0.000	0.001	0.000
25X-4-111-113	68	9.76	48	48	r	52.93	0.22	0.82	1.24	21.11	0.98	21.72	1.64	0.13	0.00	0.00	0.01	0.02	100.82	0.60	0.34	0.01	64.7	1.962	0.000	0.030	0.000	0.036	0.035	0.655	0.031	1.200	0.065	0.000	0.000	0.000	0.000	0.001
25X-4-111-113	68	9.76	50	53		53.06	0.17	0.56	0.81	21.18	1.40	21.83	1.16	0.12	0.01	0.02	0.02	0.00	100.34	0.61	0.35	0.01	64.7	1.976	0.000	0.019	0.000	0.025	0.023	0.660	0.044	1.212	0.046	0.000	0.000	0.001	0.001	0.000
25X-4-111-113	68	9.76	50	54		52.72	0.16	0.65	1.73	21.48	1.51	21.27	1.25	0.13	0.01	0.00	0.03	0.00	100.94	0.59	0.36	0.01	63.8	1.962	0.000	0.024	0.000	0.029	0.048	0.669	0.048	1.180	0.050	0.000	0.000	0.000	0.001	0.000
25X-4-111-113	68	9.76	50	55		52.84	0.15	0.64	0.78	21.24	1.49	21.53	1.21	0.14	0.00	0.00	0.00	0.00	100.02	0.60	0.36	0.01	64.4	1.976	0.000	0.020	0.004	0.028	0.022	0.664	0.047	1.200	0.048	0.000	0.000	0.000	0.000	0.000
25X-4-111-113	68	9.76	52	59		52.67	0.23	0.71	0.86	21.92	1.09	21.18	1.46	0.13	0.00	0.06	0.00	0.03	100.35	0.59	0.36	0.01	63.3	1.968	0.000	0.025	0.000	0.031	0.024	0.685	0.034	1.180	0.058	0.000	0.000	0.002	0.000	0.001
25X-4-111-113	68	9.76	52	60		53.00	0.22	0.93	1.54	19.57	0.90	22.76	1.50	0.13	0.00	0.01	0.00	0.00	100.56	0.63	0.32	0.01	67.5	1.957	0.000	0.034	0.000	0.040	0.043	0.604	0.028	1.252	0.059	0.000	0.000	0.000	0.000	0.000
25X-4-111-113	68	9.76	53	62	c	52.99	0.15	0.66	0.81	20.94	1.33	22.04	1.12	0.12	0.00	0.03	0.00	0.03	100.22	0.61	0.35	0.01	65.2	1.972	0.000	0.023	0.001	0.029	0.023	0.652	0.042	1.223	0.045	0.000	0.000	0.001	0.000	0.001
25X-4-111-113	68	9.76	53	63		52.99	0.16	0.65	0.82	20.77	1.37	22.07	1.09	0.13	0.01	0.00	0.00	0.01	100.07	0.61	0.35	0.01	65.4	1.974	0.000	0.021	0.003	0.029	0.023	0.647	0.043	1.226	0.044	0.000	0.000	0.000	0.000	0.000
29X-5-13-15	80	12.11	80	5		51.99	0.28	0.96	1.12	22.21	1.10	20.22	1.73	0.16	0.02	0.00	0.04		99.83	0.57	0.37	0.02	61.9	1.961	0.000	0.031	0.004	0.043	0.032	0.701	0.035	1.137	0.070	0.000	0.001	0.000	0.001
29X-5-13-15	80	12.11	80	6		52.27	0.30	1.18	1.57	20.66	0.97	21.50	1.70	0.13	0.01	0.04	0.00		100.33	0.60	0.34	0.01	65.0	1.948	0.000	0.043	0.000	0.052	0.044	0.644	0.031	1.194	0.068	0.000	0.000	0.001	0.000
29X-5-13-15	80	12.11	81	7	c	54.23	0.20	1.23	1.35	14.94	0.57	26.11	1.72	0.16	0.00	0.06	0.03		100.59	0.70	0.23	0.01	75.7	1.955	0.000	0.040	0.007	0.052	0.037	0.450	0.017	1.403	0.066	0.000	0.000	0.002	0.001
29X-5-13-15	80	12.11	81	8	c	53.76	0.21	1.54	1.57	14.92	0.50	25.86	1.81	0.13	0.01	0.03	0.00		100.35	0.70	0.23	0.01	75.5	1.944	0.000	0.050	0.010	0.066	0.043	0.451	0.015	1.394	0.070	0.000	0.000	0.001	0.000
29X-5-13-15	80	12.11	81	9	r	53.99	0.18	1.46	1.89	14.03	0.51	26.60	1.69	0.13	0.00	0.04	0.00		100.52	0.71	0.22	0.00	77.2	1.943	0.000	0.053	0.004	0.062	0.051	0.422	0.016	1.426	0.065	0.000	0.000	0.001	0.000
29X-5-13-15	80	12.11	82	10		53.35	0.19	1.32	1.92	16.06	0.57	24.96	1.74	0.13	0.00	0.01	0.01		100.26	0.68	0.25	0.01	73.5	1.945	0.000	0.050	0.001	0.057	0.053	0.490	0.018	1.356	0.068	0.000	0.000	0.000	0.000
29X-5-13-15	80	12.11	82	11		53.56	0.22	1.30	2.02	16.06	0.58	25.09	1.74	0.13	0.01	0.00	0.02		100.72	0.68	0.25	0.01	73.6	1.943	0.000	0.050	0.000	0.056	0.055	0.487	0.018	1.357	0.068	0.000	0.000	0.000	0.001
29X-5-13-15	80	12.11	82	12	r	53.49	0.20	1.22	1.83	15.93	0.57	25.10	1.74	0.14	0.00	0.02	0.02		100.26	0.68	0.25	0.01	73.7	1.948	0.000	0.047	0.000	0.052	0.050	0.485	0.018	1.362	0.068	0.000	0.000	0.001	0.001
29X-5-13-15	80	12.11	83	13		53.24	0.22	1.33	2.19	16.53	0.58	24.63	1.82	0.11	0.00	0.02	0.00		100.67	0.67	0.26	0.01	72.6	1.939	0.000	0.051	0.000	0.057	0.060	0.504	0.018	1.337	0.071	0.000	0.000	0.001	0.000
29X-5-13-15	80	12.11	83	14		53.55	0.21	1.29	1.70	16.91	0.63	24.56	1.79	0.13	0.00	0.00	0.00		100.77	0.67	0.27	0.01	72.1	1.948	0.000	0.046	0.003	0.055	0.046	0.515	0.019	1.332	0.070	0.000	0.000	0.000	0.000
29X-5-13-15	80	12.11	83	15		53.97	0.17	0.86	0.77	17.23	0.64	24.71	1.70	0.11	0.02	0.04	0.02		100.24	0.67	0.27	0.02	71.9	1.970	0.000	0.025	0.007	0.037	0.021	0.526	0.020	1.344	0.066	0.000	0.001	0.001	0.001
29X-5-13-15	80	12.11	47a	101		51.01	0.20	0.45	0.30	27.67	1.42	16.37	1.76	0.13	0.01	0.04	0.00		99.36	0.47	0.47	0.03	51.3	1.984	0.000	0.010	0.005	0.021	0.009	0.900	0.047	0.949	0.073	0.006	0.000	0.001	0.000
29X-5-13-15	80	12.11	47a	102		51.15	0.24	0.52	0.49	27.81	1.42	16.42	1.77	0.13	0.00	0.00	0.00		99.95	0.47	0.47	0.03	51.3	1.979	0.003	0.011	0.003	0.024	0.014	0.900	0.047	0.947	0.073	0.004	0.000	0.000	0.000
29X-5-13-15	80	12.11	47a	103		51.26	0.28	0.52	0.52	27.76	1.52	16.46	1.70	0.14	0.02	0.01	0.02		100.21	0.47	0.47	0.03	51.4	1.978	0.002	0.012	0.002	0.024	0.015	0.896	0.050	0.947	0.070	0.006	0.001	0.000	0.001
29X-5-13-15	80	12.11	47a	104		50.70	0.28	0.81	0.81	27.65	1.39	16.24	1.81	0.12	0.00	0.02	0.00		99.83	0.47	0.47	0.02	51.1	1.966	0.000	0.026	0.003	0.037	0.024	0.896	0.046	0.938	0.075	0.000	0.000	0.001	0.000
29X-5-13-15	80	12.11	47a	105		50.14	0.35	0.95	0.63	28.49	1.38	15.38	1.81	0.14	0.00	0.02	0.00		99.29	0.45	0.49	0.02	49.0	1.963	0.000	0.026	0.007	0.044	0.019	0.933	0.046	0.898	0.076	0.000	0.000	0.001	0.000
29X-CC-5-7	87	12.31	22a	13		50.17	0.18	0.51	1.65	26.01	2.08	16.43	1.50	0.16	0.00	0.01	0.09		98.80	0.48	0.46	0.02	53.0	1.965	0.000	0.018	0.000	0.024	0.049	0.852	0.069	0.959	0.063	0.000	0.000	0.000	0.003
29X-CC-5-7	87	12.31	22a	14		50.98	0.18	0.52	0.82	26.78	2.21	16.49	1.48	0.17	0.01	0.01	0.00		99.65	0.48	0.47	0.02	52.3	1.977	0.000	0.017	0.001	0.024	0.024	0.869	0.073	0.953	0.062	0.000	0.000	0.000	0.000
29X-CC-5-7	87	12.31	22a	15		50.92	0.20	0.48	1.11	26.66	2.21	16.61	1.47	0.14	0.01	0.03	0.00		99.84	0.48	0.47	0.02	52.6	1.972	0.005	0.011	0.000	0.022	0.032	0.864	0.072	0.959	0.061	0.000	0.000	0.001	0.000
29X-CC-5-7	87	12.31	22b	16		50.80	0.20	0.52	0.93	26.70	2.22	16.42	1.48	0.17	0.01	0.01	0.00		99.45	0.48	0.47	0.02	52.3	1.975	0.006	0.012	0.000	0.024	0.027	0.868	0.073	0.952	0.062	0.000	0.000	0.000	0.000
29X-CC-5-7	87	12.31	22b	17		51.15	0.22	0.69	0.59	25.78	2.10	17.31	1.47	0.14	0.01	0.02	0.04		99.52	0.50	0.45	0.02	54.5	1.975	0.000	0.019	0.006	0.031	0.017	0.832	0.069	0.996	0.061	0.000	0.000	0.001	0.001
29X-CC-5-7	87	12.31	22c	18		51.13	0.19	0.41	0.71	26.20	2.21	17.02	1.36	0.15	0.02	0.02	0.04		99.46	0.49	0.46	0.02	53.7	1.981	0.002	0.011	0.000	0.019	0.021	0.849	0.073	0.983	0.056	0.003	0.001	0.001	0.001
29X-CC-5-7	87	12.31	22c	19		52.32	0.18	0.46	0.21	24.10	1.85	19.33	1.36	0.12	0.00	0.02	0.00		99.95	0.55	0.41	0.02	58.8	1.986	0.000	0.009	0.006	0.021	0.006	0.765	0.059	1.093	0.055	0.005	0.000	0.001	0.000
29X-CC-5-7	87	12.31	22c	20		52.09	0.27	1.00	1.01	22.02	1.69	20.31	1.45	0.16	0.00	0.01	0.00		100.01	0.57	0.37	0.01	62.2	1.962	0.000	0.031	0.006	0.044	0.029	0.693	0.054	1.140	0.059	0.000	0.000	0.000	0.000
29X-CC-5-7	87	12.31	22c	21		52.02	0.28	0.99	1.46	21.54	1.73	20.59	1.36	0.15	0.01	0.03	0.00		100.16	0.58	0.37	0.01	63.0	1.955	0.000	0.036	0.000	0.044	0.041	0.677	0.055	1.153	0.055	0.000	0.000	0.001	0.000
29X-CC-5-7	87	12.31	22c	22		52.40	0.27	1.07	1.51	19.95	1.61	21.75	1.49	0.14	0.00	0.04	0.00		100.23	0.60	0.34	0.01	66.0	1.952	0.000	0.039	0.000	0.047	0.042	0.621	0.051	1.208	0.059	0.000	0.000	0.001	0.000
29X-CC-5-7	87	12.31	22c	23		51.15	0.23	0.74	0.76	25.97	2.13	17.39	1.27	0.13	0.00	0.01	0.02		99.80	0.50	0.45	0.01	54.4	1.970	0.000	0.023	0.004	0.034	0.022	0.837	0.069	0.998	0.052	0.000	0.000	0.000	0.001
29X-CC-5-7	87	12.31	22c	24		50.88	0.20	0.56	0.26	26.92	2.25	16.57	1.21	0.13	0.03	0.03	0.05		99.09	0.48	0.48	0.02	52.3	1.983	0.002	0.010	0.008	0.026	0.008	0.877	0.074	0.962	0.051	0.004	0.001	0.001	0.002
29X-CC-5-7	87	12.31	22c	25		51.06	0.17	0.50	0.61	27.27	2.23	16.45	1.40	0.11	0.01	0.00	0.03		99.84	0.48	0.48	0.02	51.8	1.979	0.000	0.016	0.002	0.023	0.018	0.884	0.073	0.950	0.058	0.000	0.000	0.000	0.001
29X-CC-5-7	87	12.31	23a	26		50.81	0.21	0.55	1.02	26.68	2.11	16.59	1.49	0.14	0.00	0.03	0.00		99.63	0.48	0.47	0.02	52.6	1.971	0.000	0.019	0.000	0.025	0.030	0.866	0.069	0.959	0.062	0.000	0.000	0.001	0.000
29X-CC-5-7	87	12.31	23a	27		50.95	0.17	0.53	0.45	26.67	2.17	16.69	1.46	0.12	0.00	0.02	0.04		99.26	0.48	0.47	0.02	52.7	1.981	0.000	0.014	0.005	0.024	0.013	0.867	0.071	0.967	0.061	0.000	0.000	0.001	0.001
29X-CC-5-7	87	12.31	23a	28		50.80	0.14	0.52	0.94	26.30	2.10	16.76	1.44	0.15	0.01	0.00	0.00		99.16	0.49	0.46	0.02	53.2	1.976	0.000	0.020	0.000	0.024	0.028	0.856	0.069	0.972	0.060	0.000	0.000	0.000	0.000
29X-CC-5-7	87	12.31	23a	29		51.45	0.13	0.35	0.48	26.85	2.10	16.96	1.48	0.11	0.01	0.01	0.00		99.93	0.49	0.47	0.02	53.0	1.985	0.003	0.008	0.001	0.016	0.014	0.866	0.069	0.976	0.061	0.001	0.000	0.000	0.000
29X-CC-5-7	87	12.31	23a	30		51.05	0.12	0.34	0.71	27.03	2.15	16.46	1.42	0.15	0.02	0.00	0.03		99.48	0.48	0.47	0.02	52.0	1.984	0.002	0.010	0.000	0.016	0.021	0.879	0.071	0.954	0.059	0.001	0.001	0.000	0.001
35X-6-142-144	102	25.04	42	26		50.74	0.25	0.84	3.37	20.73	1.13	20.57	1.37	0.13	0.00	0.02	0.00	0.00	99.16	0.58	0.35	0.00	63.9	1.930	0.000	0.031	0.000	0.038	0.097	0.660	0.036	1.166	0.056	0.000	0.000	0.001	0.000	0.000
35X-6-142-144	102	25.04	42	27		51.72	0.19	0.82	1.40	21.66	1.26	20.65	1.35	0.13	0.00	0.02	0.00	0.03	99.23	0.58	0.36	0.01	62.9	1.959	0.000	0.031	0.000	0.037	0.040	0.686	0.040	1.166	0.055	0.000	0.000	0.001	0.000	0.001
36X-2-66-68	104	25.83	21	19		53.33	0.15	0.67	1.40	18.85	0.85	23.27	1.64	0.14	0.01	0.00	0.00	0.03	100.34	0.64	0.30	0.02	68.8	1.966	0.000	0.025	0.000	0.029	0.039	0.581	0.027	1.278	0.065	0.000	0.000	0.000	0.000	0.001
36X-2-66-68	104	25.83	21	20		52.88	0.16	0.95	2.25	18.42	0.83	23.27	1.59	0.13	0.00	0.04	0.00	0.00	100.53	0.64	0.30	0.01	69.2	1.948	0.000	0.037	0.000	0.041	0.062	0.567	0.026	1.278	0.063	0.000	0.000	0.001	0.000	0.000
36X-2-66-68	104	25.83	22	27		53.20	0.14	0.81	1.36	19.01	0.83	23.22	1.49	0.14	0.01	0.00	0.00	0.04	100.25	0.64	0.31	0.01	68.5	1.963	0.000	0.031	0.000	0.035	0.038	0.587	0.026	1.277	0.059	0.000	0.000	0.000	0.000	0.001
36X-2-66-68	104	25.83	22	28		53.16	0.16	0.83	1.51	19.35	0.81	23.05	1.53	0.12	0.00	0.03	0.02	0.04	100.61	0.63	0.31	0.01	68.0	1.959	0.000	0.032	0.000	0.036	0.042	0.596	0.025	1.266	0.060	0.000	0.000	0.001	0.001	0.001
36X-2-66-68	104	25.83	22	29		53.07	0.20	0.91	1.78	18.80	0.71	23.32	1.56	0.12	0.00	0.01	0.00	0.00	100.48	0.64	0.30	0.01	68.9	1.954	0.000	0.034	0.000	0.039	0.049	0.579	0.022	1.280	0.062	0.000	0.000	0.000	0.000	0.000
36X-2-66-68	104	25.83	23	35		53.19	0.16	0.79	1.12	19.52	0.75	22.92	1.60	0.12	0.01	0.02	0.02	0.02	100.24	0.63	0.31	0.02	67.7	1.966	0.000	0.029	0.000	0.034	0.031	0.603	0.023	1.263	0.063	0.000	0.000	0.001	0.001	0.001
36X-2-66-68	104	25.83	23	36		52.86	0.19	0.93	1.80	18.96	0.80	23.04	1.53	0.14	0.00	0.02	0.02	0.04	100.33	0.63	0.31	0.01	68.4	1.952	0.000	0.035	0.000	0.040	0.050	0.586	0.025	1.268	0.061	0.000	0.000	0.001	0.001	0.001
36X-2-66-68	104	25.83	23	37		53.30	0.18	0.77	1.63	18.96	0.84	23.42	1.47	0.12	0.00	0.00	0.01	0.05	100.74	0.64	0.30	0.01	68.8	1.958	0.000	0.028	0.000	0.033	0.045	0.582	0.026	1.282	0.058	0.000	0.000	0.000	0.000	0.002
36X-2-66-68	104	25.83	23	38	r	53.34	0.14	0.70	1.18	18.76	0.79	23.52	1.53	0.10	0.02	0.05	0.00	0.03	100.17	0.65	0.30	0.02	69.1	1.966	0.000	0.027	0.000	0.030	0.033	0.578	0.025	1.292	0.060	0.000	0.001	0.001	0.000	0.001
36X-2-66-68	104	25.83	24	46		52.89	0.18	0.87	1.83	18.93	0.78	23.07	1.51	0.14	0.01	0.01	0.01	0.03	100.26	0.64	0.30	0.01	68.5	1.954	0.000	0.033	0.000	0.038	0.051	0.585	0.024	1.271	0.060	0.000	0.000	0.000	0.000	0.001
36X-2-66-68	104	25.83	24	47		53.26	0.18	0.71	1.50	19.23	0.78	23.14	1.55	0.13	0.02	0.00	0.00	0.03	100.53	0.64	0.31	0.01	68.2	1.962	0.000	0.026	0.000	0.031	0.042	0.592	0.024	1.271	0.061	0.000	0.001	0.000	0.000	0.001
36X-2-66-68	104	25.83	25	39		53.83	0.16	0.85	0.91	18.58	0.66	23.84	1.69	0.13	0.01	0.00	0.00	0.01	100.66	0.65	0.29	0.02	69.6	1.969	0.000	0.026	0.006	0.037	0.025	0.568	0.020	1.300	0.066	0.000	0.000	0.000	0.000	0.000
36X-2-66-68	104	25.83	25	40		53.07	0.19	0.91	1.76	18.47	0.81	23.49	1.47	0.13	0.01	0.02	0.00	0.02	100.35	0.64	0.30	0.01	69.4	1.954	0.000	0.034	0.000	0.039	0.049	0.569	0.025	1.289	0.058	0.000	0.000	0.001	0.000	0.001
36X-2-66-68	104	25.83	26	50		53.33	0.17	0.89	1.15	18.78	0.67	23.45	1.59	0.14	0.01	0.02	0.03	0.04	100.28	0.64	0.30	0.01	69.0	1.963	0.000	0.032	0.002	0.039	0.032	0.578	0.021	1.287	0.063	0.000	0.000	0.001	0.001	0.001
36X-2-66-68	104	25.83	26	51		53.47	0.17	0.93	0.77	18.94	0.67	23.48	1.59	0.13	0.01	0.00	0.01	0.03	100.21	0.64	0.30	0.02	68.8	1.968	0.000	0.027	0.008	0.040	0.021	0.583	0.021	1.288	0.063	0.000	0.000	0.000	0.000	0.001
37X-4-43-45	106	29.22	33	36		51.83	0.11	0.60	0.82	24.14	1.83	19.41	0.73	0.11	0.02			0.01	99.61	0.55	0.41	0.00	58.9	1.976	0.000	0.021	0.003	0.027	0.024	0.770	0.059	1.103	0.030	0.000	0.001			0.000
37X-4-43-45	106	29.22	33	37		52.22	0.08	0.53	0.47	24.15	1.82	19.61	0.72	0.13	0.02			0.01	99.77	0.56	0.41	0.01	59.1	1.984	0.000	0.014	0.008	0.024	0.014	0.767	0.059	1.110	0.029	0.000	0.001			0.000
37X-4-43-45	106	29.22	33	38		52.15	0.08	0.52	0.90	24.03	1.87	19.56	0.73	0.14	0.02			0.00	100.00	0.55	0.41	0.00	59.2	1.979	0.000	0.019	0.002	0.023	0.026	0.763	0.060	1.106	0.030	0.000	0.001			0.000
37X-4-43-45	106	29.22	37	39		51.98	0.11	0.52	1.24	23.83	1.87	19.66	0.69	0.14	0.00			0.02	100.05	0.56	0.41	0.00	59.5	1.972	0.000	0.020	0.000	0.023	0.035	0.756	0.060	1.112	0.028	0.000	0.000			0.001
37X-4-43-45	106	29.22	37	40		52.21	0.13	0.58	0.52	24.12	1.82	19.71	0.71	0.12	0.01			0.02	99.95	0.56	0.41	0.00	59.3	1.980	0.000	0.017	0.005	0.026	0.015	0.765	0.058	1.114	0.029	0.000	0.000			0.001
37X-4-43-45	106	29.22	37	41		52.07	0.13	0.64	0.61	24.17	1.78	19.59	0.70	0.13	0.01			0.02	99.85	0.55	0.41	0.00	59.1	1.977	0.000	0.019	0.006	0.029	0.017	0.768	0.057	1.109	0.028	0.000	0.000			0.001
37X-4-43-45	106	29.22	42	43		51.73	0.10	0.55	0.74	24.79	1.76	19.05	0.71	0.12	0.00			0.02	99.56	0.54	0.42	0.00	57.8	1.978	0.000	0.020	0.002	0.025	0.021	0.792	0.057	1.085	0.029	0.000	0.000			0.001
37X-4-43-45	106	29.22	42	44		51.99	0.11	0.56	1.18	25.19	1.93	18.93	0.69	0.13	0.00			0.05	100.76	0.53	0.43	0.00	57.3	1.970	0.000	0.022	0.000	0.025	0.034	0.798	0.062	1.069	0.028	0.000	0.000			0.002
37X-4-43-45	106	29.22	45	45		53.13	0.21	1.24	1.44	17.20	0.50	24.35	1.50	0.15	0.00			0.00	99.71	0.67	0.27	0.01	71.6	1.953	0.000	0.041	0.007	0.054	0.040	0.529	0.016	1.334	0.059	0.000	0.000			0.000
37X-4-43-45	106	29.22	45	46		52.96	0.27	1.53	1.64	15.79	0.64	22.79	4.47	0.17	0.00			0.00	100.25	0.62	0.25	0.10	72.0	1.943	0.007	0.057	0.009	0.066	0.045	0.484	0.020	1.246	0.256	0.000	0.000			0.000
37X-4-43-45	106	29.22	45	47		53.30	0.23	1.48	0.82	17.67	0.52	24.20	1.50	0.15	0.02			0.03	99.91	0.66	0.28	0.01	70.9	1.955	0.000	0.039	0.019	0.064	0.023	0.542	0.016	1.323	0.059	0.000	0.001			0.001
37X-4-43-45	106	29.22	45	48		53.24	0.24	1.45	0.90	17.47	0.70	24.17	1.48	0.16	0.00			0.01	99.82	0.66	0.28	0.01	71.1	1.955	0.000	0.039	0.018	0.063	0.025	0.537	0.022	1.323	0.058	0.000	0.000			0.000
37X-4-43-45	106	29.22	45	49		53.34	0.24	1.40	1.31	17.42	0.62	24.30	1.52	0.15	0.00			0.00	100.30	0.66	0.28	0.01	71.3	1.950	0.000	0.043	0.011	0.060	0.036	0.533	0.019	1.324	0.060	0.000	0.000			0.000
39X-1-21-23	108	33.26	30	54	r	54.07	0.21	1.53	1.37	13.05	0.30	26.91	2.33	0.13	0.00	0.06	0.00	0.03	99.99	0.72	0.20	0.02	78.6	1.946	0.000	0.049	0.011	0.065	0.037	0.393	0.009	1.443	0.090	0.000	0.000	0.002	0.000	0.001
39X-1-21-23	108	33.26	30	55	c	54.53	0.17	1.21	1.75	13.00	0.38	27.11	2.33	0.15	0.01	0.07	0.00	0.03	100.75	0.72	0.20	0.02	78.8	1.949	0.000	0.046	0.000	0.051	0.047	0.389	0.012	1.445	0.089	0.000	0.000	0.002	0.000	0.001
39X-1-21-23	108	33.26	30	56	r	54.48	0.17	1.37	1.82	12.66	0.32	27.32	2.31	0.14	0.01	0.06	0.04	0.03	100.73	0.73	0.19	0.02	79.4	1.945	0.000	0.050	0.003	0.058	0.049	0.378	0.010	1.454	0.088	0.000	0.000	0.002	0.001	0.001
39X-1-21-23	108	33.26	30	57		54.66	0.17	1.31	1.41	13.32	0.41	27.07	2.27	0.14	0.00	0.04	0.02	0.02	100.83	0.72	0.21	0.02	78.4	1.952	0.000	0.043	0.007	0.055	0.038	0.398	0.012	1.441	0.087	0.000	0.000	0.001	0.001	0.001
39X-1-21-23	108	33.26	30	58		54.67	0.21	1.36	1.84	13.17	0.39	27.27	2.27	0.13	0.00	0.06	0.00	0.06	101.43	0.72	0.20	0.02	78.7	1.942	0.000	0.051	0.000	0.057	0.049	0.391	0.012	1.444	0.086	0.000	0.000	0.002	0.000	0.002
39X-1-21-23	108	33.26	33	42	c	53.46	0.23	1.15	1.33	18.05	0.47	24.38	1.29	0.11	0.01	0.07	0.00	0.02	100.57	0.66	0.28	0.00	70.7	1.953	0.000	0.041	0.002	0.050	0.037	0.551	0.015	1.327	0.050	0.000	0.000	0.002	0.000	0.001
39X-1-21-23	108	33.26	33	43	c	53.45	0.25	1.18	1.08	18.22	0.46	24.44	1.11	0.10	0.01	0.07	0.02	0.02	100.41	0.67	0.29	0.00	70.5	1.955	0.000	0.038	0.006	0.051	0.030	0.557	0.014	1.332	0.043	0.000	0.000	0.002	0.001	0.001
39X-1-21-23	108	33.26	33	44	c	53.39	0.19	1.12	1.64	18.11	0.39	24.30	1.37	0.11	0.01	0.05	0.00	0.05	100.73	0.66	0.28	0.00	70.5	1.949	0.000	0.043	0.000	0.048	0.045	0.553	0.012	1.322	0.054	0.000	0.000	0.001	0.000	0.002
39X-1-21-23	108	33.26	33	45	c	53.46	0.20	0.86	1.39	18.19	0.42	24.08	1.45	0.15	0.00	0.07	0.02	0.00	100.29	0.66	0.29	0.01	70.2	1.961	0.000	0.032	0.000	0.037	0.038	0.558	0.013	1.317	0.057	0.000	0.000	0.002	0.001	0.000
39X-1-21-23	108	33.26	33	47	r	53.21	0.24	1.05	1.64	18.37	0.45	23.93	1.36	0.13	0.01	0.04	0.05	0.03	100.51	0.65	0.29	0.01	69.9	1.951	0.000	0.039	0.000	0.045	0.045	0.563	0.014	1.308	0.053	0.000	0.000	0.001	0.001	0.001
39X-1-21-23	108	33.26	34	48		52.23	0.28	1.74	1.90	18.84	0.61	22.28	2.29	0.14	0.02	0.00	0.00	0.05	100.38	0.61	0.30	0.01	67.8	1.931	0.000	0.061	0.007	0.076	0.053	0.582	0.019	1.228	0.091	0.000	0.001	0.000	0.000	0.002
39X-1-21-23	108	33.26	34	49		52.80	0.27	1.41	1.69	18.44	0.63	23.15	1.98	0.11	0.00	0.01	0.02	0.01	100.52	0.63	0.29	0.01	69.1	1.942	0.000	0.051	0.003	0.061	0.047	0.567	0.020	1.269	0.078	0.000	0.000	0.000	0.001	0.000
41X-2-53-55	112	39.10	28	78		52.66	0.31	1.67	0.89	18.50	0.73	23.04	1.83	0.13	0.00	0.02	0.00	0.00	99.78	0.63	0.30	0.01	68.9	1.947	0.000	0.044	0.020	0.073	0.025	0.572	0.023	1.270	0.072	0.000	0.000	0.001	0.000	0.000
41X-2-53-55	112	39.10	28	79		52.62	0.28	1.68	1.37	18.66	0.77	22.90	1.81	0.14	0.00	0.00	0.01	0.03	100.27	0.63	0.30	0.01	68.6	1.940	0.000	0.052	0.013	0.073	0.038	0.575	0.024	1.259	0.072	0.000	0.000	0.000	0.000	0.001
41X-2-53-55	112	39.10	28	80		52.89	0.24	1.52	1.56	18.01	0.74	23.00	2.34	0.17	0.00	0.03	0.02	0.05	100.58	0.63	0.29	0.02	69.5	1.942	0.000	0.051	0.008	0.066	0.043	0.553	0.023	1.259	0.092	0.000	0.000	0.001	0.001	0.002
41X-2-53-55	112	39.10	28	81		53.38	0.20	1.13	0.96	18.53	0.80	23.70	1.51	0.10	0.00	0.04	0.03	0.00	100.39	0.65	0.30	0.01	69.5	1.960	0.000	0.035	0.009	0.049	0.027	0.569	0.025	1.297	0.059	0.000	0.000	0.001	0.001	0.000
41X-2-53-55	112	39.10	28	82		53.72	0.15	0.94	0.91	17.77	0.70	24.10	1.76	0.15	0.01	0.00	0.00	0.02	100.23	0.66	0.28	0.02	70.7	1.968	0.000	0.028	0.008	0.041	0.025	0.544	0.022	1.316	0.069	0.000	0.000	0.000	0.000	0.001
41X-2-53-55	112	39.10	28	83		53.73	0.19	0.93	0.34	18.50	0.61	23.91	1.73	0.11	0.00	0.01	0.00	0.02	100.08	0.65	0.29	0.02	69.7	1.973	0.000	0.022	0.013	0.040	0.010	0.568	0.019	1.308	0.068	0.000	0.000	0.000	0.000	0.001
41X-2-53-55	112	39.10	28	85		53.75	0.21	1.06	0.84	17.83	0.87	24.46	1.27	0.10	0.02	0.05	0.00	0.00	100.46	0.67	0.29	0.01	71.0	1.963	0.000	0.031	0.009	0.046	0.023	0.545	0.027	1.332	0.050	0.000	0.001	0.001	0.000	0.000
41X-2-53-55	112	39.10	28	86		53.20	0.24	1.98	1.75	17.58	0.55	23.95	1.88	0.15	0.00	0.07	0.00	0.05	101.41	0.65	0.28	0.00	70.8	1.929	0.000	0.064	0.014	0.085	0.048	0.533	0.017	1.295	0.073	0.000	0.000	0.002	0.000	0.002
41X-2-53-55	112	39.10	29	71	c	54.28	0.21	1.55	1.72	14.55	0.53	26.71	1.43	0.12	0.01	0.00	0.00	0.01	101.12	0.71	0.23	0.00	76.6	1.942	0.000	0.052	0.008	0.065	0.046	0.436	0.016	1.425	0.055	0.000	0.000	0.000	0.000	0.000
41X-2-53-55	112	39.10	29	72		54.19	0.21	1.56	1.56	14.94	0.59	26.56	1.29	0.11	0.01	0.02	0.00	0.04	101.08	0.71	0.23	0.00	76.0	1.942	0.000	0.052	0.008	0.066	0.042	0.448	0.018	1.419	0.050	0.000	0.000	0.001	0.000	0.001
41X-2-53-55	112	39.10	29	73		53.86	0.24	1.57	1.98	14.30	0.54	26.62	1.38	0.12	0.01	0.00	0.03	0.03	100.69	0.71	0.22	0.00	76.8	1.936	0.000	0.057	0.003	0.067	0.054	0.430	0.016	1.427	0.053	0.000	0.000	0.000	0.001	0.001
41X-2-53-55	112	39.10	29	74	r	54.05	0.20	1.49	1.32	14.30	0.57	26.74	1.26	0.14	0.01	0.02	0.00	0.01	100.11	0.72	0.22	0.00	76.9	1.949	0.000	0.045	0.013	0.063	0.036	0.431	0.017	1.437	0.049	0.000	0.000	0.001	0.000	0.000
41X-2-53-55	112	39.10	31	93		53.81	0.19	0.99	0.76	17.33	0.76	24.58	1.54	0.13	0.01	0.01	0.00	0.00	100.11	0.67	0.28	0.01	71.7	1.968	0.000	0.027	0.010	0.043	0.021	0.530	0.024	1.340	0.060	0.000	0.000	0.000	0.000	0.000
41X-2-53-55	112	39.10	31	94		53.55	0.23	1.00	1.48	17.29	0.71	24.49	1.63	0.12	0.00	0.05	0.00	0.03	100.58	0.67	0.27	0.01	71.6	1.954	0.000	0.037	0.000	0.043	0.041	0.528	0.022	1.332	0.064	0.000	0.000	0.001	0.000	0.001
41X-2-53-55	112	39.10	33	107		53.59	0.19	1.12	0.97	17.81	0.78	24.11	1.55	0.15	0.02	0.04	0.00	0.03	100.36	0.66	0.28	0.01	70.7	1.961	0.000	0.034	0.009	0.048	0.027	0.545	0.024	1.315	0.061	0.000	0.001	0.001	0.000	0.001
41X-2-53-55	112	39.10	33	108		53.16	0.27	1.34	1.85	17.37	0.70	24.04	1.75	0.13	0.00	0.02	0.08	0.02	100.74	0.65	0.28	0.01	71.2	1.942	0.000	0.050	0.000	0.058	0.051	0.531	0.022	1.309	0.068	0.000	0.000	0.001	0.002	0.001
41X-2-53-55	112	39.10	33	109		53.20	0.23	1.54	0.69	17.81	0.85	23.91	1.59	0.13	0.00	0.02	0.00	0.05	100.02	0.65	0.29	0.01	70.5	1.953	0.000	0.041	0.019	0.067	0.019	0.547	0.026	1.308	0.063	0.000	0.000	0.001	0.000	0.002
41X-2-53-55	112	39.10	34	116		53.52	0.20	1.09	1.27	17.45	0.73	24.23	1.67	0.14	0.01	0.00	0.02	0.02	100.36	0.66	0.28	0.01	71.2	1.958	0.000	0.037	0.005	0.047	0.035	0.534	0.023	1.321	0.065	0.000	0.000	0.000	0.001	0.001
41X-2-53-55	112	39.10	34	117		53.11	0.24	1.49	1.62	17.47	0.63	23.98	1.91	0.10	0.00	0.00	0.00	0.02	100.57	0.65	0.28	0.01	71.0	1.942	0.000	0.052	0.006	0.064	0.044	0.534	0.020	1.307	0.075	0.000	0.000	0.000	0.000	0.001
41X-2-53-55	112	39.10	34	118		52.98	0.21	1.63	1.55	17.61	0.61	23.89	1.73	0.13	0.00	0.00	0.00	0.04	100.38	0.65	0.28	0.01	70.7	1.940	0.000	0.054	0.011	0.070	0.043	0.539	0.019	1.304	0.068	0.000	0.000	0.000	0.000	0.001
41X-2-53-55	112	39.10	34	119		53.89	0.17	0.78	0.84	17.38	0.68	24.61	1.64	0.13	0.00	0.02	0.00	0.02	100.15	0.67	0.28	0.02	71.6	1.970	0.000	0.025	0.004	0.034	0.023	0.531	0.021	1.341	0.064	0.000	0.000	0.001	0.000	0.001
41X-2-53-55	112	39.10	34	120		54.93	0.22	1.54	0.00	18.01	0.70	24.80	1.45	0.14	0.04	0.00	0.03	0.04	101.90	0.66	0.28	0.01	71.1	1.971	0.000	0.023	0.036	0.065	0.000	0.541	0.021	1.327	0.056	0.000	0.002	0.000	0.001	0.001
41X-2-53-55	112	39.10	35	121		53.51	0.21	1.11	1.09	17.47	0.66	24.42	1.55	0.12	0.00	0.05	0.03	0.03	100.25	0.67	0.28	0.01	71.4	1.957	0.000	0.037	0.005	0.048	0.030	0.535	0.020	1.331	0.061	0.000	0.000	0.001	0.001	0.001
41X-2-53-55	112	39.10	35	122		53.52	0.25	1.27	1.49	17.37	0.73	24.27	1.65	0.16	0.00	0.03	0.06	0.03	100.83	0.66	0.28	0.01	71.3	1.949	0.000	0.044	0.004	0.055	0.041	0.529	0.023	1.318	0.064	0.000	0.000	0.001	0.002	0.001
41X-2-53-55	112	39.10	37	132		53.43	0.23	1.37	1.71	17.32	0.73	24.32	1.61	0.14	0.00	0.01	0.00	0.01	100.88	0.66	0.27	0.00	71.4	1.945	0.000	0.049	0.004	0.059	0.047	0.527	0.023	1.320	0.063	0.000	0.000	0.000	0.000	0.000
41X-2-53-55	112	39.10	37	133		53.96	0.23	0.87	0.48	17.53	0.79	24.58	1.60	0.13	0.00	0.00	0.00	0.03	100.20	0.67	0.28	0.02	71.4	1.972	0.000	0.022	0.009	0.037	0.013	0.536	0.024	1.339	0.063	0.000	0.000	0.000	0.000	0.001
41X-2-53-55	112	39.10	37	134		53.86	0.17	0.80	1.25	17.44	0.73	24.52	1.65	0.13	0.00	0.00	0.00	0.02	100.56	0.67	0.28	0.02	71.5	1.965	0.000	0.030	0.000	0.034	0.034	0.532	0.023	1.333	0.064	0.000	0.000	0.000	0.000	0.001
41X-2-53-55	112	39.10	40	145		53.58	0.21	1.07	1.07	17.49	0.69	24.48	1.41	0.13	0.01	0.02	0.00	0.00	100.16	0.67	0.28	0.01	71.4	1.961	0.000	0.033	0.007	0.046	0.029	0.535	0.021	1.335	0.055	0.000	0.000	0.001	0.000	0.000
41X-2-53-55	112	39.10	40	146		52.99	0.23	1.21	2.24	16.54	0.69	24.68	1.39	0.14	0.00	0.02	0.02	0.05	100.19	0.67	0.26	0.01	72.7	1.939	0.000	0.046	0.000	0.052	0.062	0.506	0.021	1.346	0.054	0.000	0.000	0.001	0.001	0.002
41X-2-53-55	112	39.10	41	148	c	52.62	0.24	1.45	2.79	16.83	0.76	24.03	1.59	0.13	0.02	0.01	0.05	0.02	100.54	0.66	0.27	0.00	71.8	1.928	0.000	0.056	0.000	0.063	0.077	0.516	0.024	1.312	0.062	0.000	0.001	0.000	0.001	0.001
41X-2-53-55	112	39.10	41	149		53.44	0.23	1.05	2.04	17.00	0.69	24.56	1.59	0.15	0.02	0.00	0.00	0.08	100.85	0.67	0.27	0.01	72.0	1.945	0.000	0.039	0.000	0.045	0.056	0.518	0.021	1.333	0.062	0.000	0.001	0.000	0.000	0.002
41X-2-53-55	112	39.10	41	150		53.72	0.15	0.87	0.72	17.42	0.76	24.40	1.55	0.17	0.00	0.02	0.00	0.04	99.82	0.67	0.28	0.02	71.4	1.971	0.000	0.025	0.009	0.038	0.020	0.535	0.024	1.334	0.061	0.000	0.000	0.001	0.000	0.001
41X-2-53-55	112	39.10	41	151	r	53.67	0.19	1.04	0.87	17.21	0.76	24.76	1.41	0.12	0.00	0.02	0.00	0.06	100.11	0.67	0.27	0.01	71.9	1.962	0.000	0.033	0.006	0.045	0.024	0.526	0.024	1.349	0.055	0.000	0.000	0.001	0.000	0.002
41X-2-53-55	112	39.10	43	159		53.12	0.25	1.53	1.20	17.23	0.71	24.19	1.66	0.13	0.01	0.00	0.00	0.04	100.07	0.66	0.28	0.01	71.4	1.947	0.000	0.047	0.013	0.066	0.033	0.528	0.022	1.321	0.065	0.000	0.000	0.000	0.000	0.001
41X-2-53-55	112	39.10	43	160		53.53	0.17	0.91	1.75	16.95	0.67	24.58	1.66	0.15	0.00	0.00	0.00	0.05	100.43	0.67	0.27	0.02	72.1	1.955	0.000	0.034	0.000	0.039	0.048	0.518	0.021	1.338	0.065	0.000	0.000	0.000	0.000	0.002
41X-2-53-55	112	39.10	43	161		53.82	0.18	0.92	1.01	17.53	0.69	24.45	1.67	0.13	0.01	0.05	0.00	0.03	100.49	0.66	0.28	0.02	71.3	1.964	0.000	0.031	0.004	0.040	0.028	0.535	0.021	1.330	0.065	0.000	0.000	0.001	0.000	0.001
41X-2-53-55	112	39.10	43	162		53.65	0.21	1.07	1.28	17.48	0.66	24.36	1.67	0.14	0.00	0.01	0.01	0.01	100.55	0.66	0.28	0.01	71.3	1.958	0.000	0.036	0.004	0.046	0.035	0.533	0.020	1.325	0.065	0.000	0.000	0.000	0.000	0.000
41X-2-53-55	112	39.10	43	163		53.47	0.23	1.08	1.09	17.88	0.68	24.07	1.73	0.11	0.01	0.02	0.00	0.04	100.41	0.66	0.28	0.01	70.6	1.957	0.000	0.036	0.004	0.047	0.030	0.547	0.021	1.313	0.068	0.000	0.000	0.001	0.000	0.001
41X-2-53-55	112	39.10	43	164		53.07	0.24	1.47	1.49	17.68	0.72	23.91	1.65	0.11	0.01	0.02	0.04	0.02	100.43	0.65	0.28	0.01	70.7	1.944	0.000	0.049	0.007	0.063	0.041	0.542	0.022	1.305	0.065	0.000	0.000	0.001	0.001	0.001
42X-CC-27-29	118	42.08	3	52	c	54.17	0.15	0.87	1.05	13.99	0.32	27.01	1.53	0.10	0.01	0.09	0.06	0.03	99.39	0.73	0.22	0.01	77.5	1.964	0.000	0.032	0.001	0.037	0.029	0.424	0.010	1.460	0.059	0.000	0.000	0.003	0.002	0.001
42X-CC-27-29	118	42.08	3	53	c	54.59	0.15	0.85	2.09	13.50	0.33	27.49	1.60	0.12	0.00	0.10	0.00	0.01	100.83	0.73	0.21	0.01	78.4	1.952	0.000	0.032	0.000	0.036	0.056	0.404	0.010	1.465	0.061	0.000	0.000	0.003	0.000	0.000
42X-CC-27-29	118	42.08	3	54	r	54.75	0.18	0.92	2.31	13.54	0.37	27.52	1.61	0.12	0.01	0.14	0.10	0.04	101.61	0.73	0.21	0.01	78.4	1.946	0.000	0.034	0.000	0.039	0.062	0.402	0.011	1.458	0.061	0.000	0.000	0.004	0.003	0.001
42X-CC-27-29	118	42.08	8	61	c	54.41	0.19	1.10	1.15	14.04	0.29	27.07	1.55	0.14	0.02	0.12	0.04	0.04	100.15	0.73	0.22	0.01	77.5	1.958	0.000	0.037	0.004	0.047	0.031	0.422	0.009	1.452	0.060	0.000	0.001	0.003	0.001	0.001
42X-CC-27-29	118	42.08	8	62		54.60	0.15	1.00	1.10	14.30	0.30	27.04	1.63	0.11	0.02	0.03	0.01	0.02	100.31	0.72	0.22	0.01	77.1	1.963	0.000	0.033	0.005	0.042	0.030	0.430	0.009	1.449	0.063	0.000	0.001	0.001	0.000	0.001
42X-CC-27-29	118	42.08	8	63		54.84	0.11	0.78	1.84	14.18	0.33	27.25	1.59	0.13	0.00	0.06	0.01	0.03	101.15	0.73	0.22	0.01	77.4	1.958	0.000	0.030	0.000	0.033	0.049	0.424	0.010	1.450	0.061	0.000	0.000	0.002	0.000	0.001
42X-CC-27-29	118	42.08	8	64	r	54.30	0.21	0.90	1.37	15.30	0.35	26.24	1.63	0.13	0.00	0.12	0.05	0.02	100.62	0.71	0.24	0.02	75.4	1.959	0.000	0.033	0.000	0.038	0.037	0.461	0.011	1.411	0.063	0.000	0.000	0.003	0.001	0.001
42X-CC-27-29	118	42.08	16	70		54.42	0.11	0.78	1.25	15.12	0.36	26.45	1.51	0.12	0.01	0.14	0.03	0.00	100.30	0.71	0.23	0.02	75.7	1.966	0.000	0.030	0.000	0.033	0.034	0.457	0.011	1.424	0.058	0.000	0.000	0.004	0.001	0.000
42X-CC-27-29	118	42.08	16	71		54.00	0.12	0.98	1.25	14.82	0.32	26.35	1.55	0.14	0.00	0.18	0.00	0.03	99.74	0.71	0.23	0.01	76.0	1.960	0.000	0.037	0.002	0.042	0.034	0.450	0.010	1.425	0.060	0.000	0.000	0.005	0.000	0.001
42X-CC-27-29	118	42.08	23	89		54.14	0.14	0.97	1.62	15.52	0.36	26.07	1.56	0.12	0.00	0.11	0.06	0.05	100.72	0.70	0.24	0.01	75.0	1.954	0.000	0.037	0.000	0.041	0.044	0.469	0.011	1.402	0.060	0.000	0.000	0.003	0.002	0.002
42X-CC-27-29	118	42.08	23	90		54.47	0.13	0.88	1.57	15.37	0.32	26.47	1.48	0.10	0.00	0.04	0.02	0.00	100.85	0.71	0.24	0.01	75.4	1.960	0.000	0.034	0.000	0.037	0.042	0.462	0.010	1.419	0.057	0.000	0.000	0.001	0.001	0.000
42X-CC-27-29	118	42.08	23	91		54.54	0.21	0.81	1.52	15.37	0.40	26.50	1.47	0.12	0.01	0.07	0.01	0.04	101.07	0.71	0.24	0.01	75.4	1.958	0.000	0.029	0.000	0.034	0.041	0.462	0.012	1.418	0.057	0.000	0.000	0.002	0.000	0.001
42X-CC-27-29	118	42.08	23	92	r	53.64	0.20	0.87	1.60	15.58	0.35	25.57	1.70	0.15	0.00	0.14	0.06	0.06	99.92	0.69	0.24	0.02	74.5	1.954	0.000	0.032	0.000	0.037	0.044	0.475	0.011	1.389	0.066	0.000	0.000	0.004	0.002	0.002
42X-CC-27-29	118	42.08	33	93	c	55.02	0.13	1.34	2.47	11.88	0.28	28.79	1.38	0.14	0.01	0.12	0.00	0.01	101.58	0.76	0.18	0.00	81.2	1.939	0.000	0.052	0.000	0.056	0.066	0.350	0.008	1.512	0.052	0.000	0.000	0.003	0.000	0.000
42X-CC-27-29	118	42.08	33	94		54.96	0.15	1.24	1.71	12.79	0.33	28.33	1.26	0.13	0.01	0.12	0.01	0.01	101.05	0.75	0.19	0.00	79.8	1.950	0.000	0.046	0.002	0.052	0.046	0.379	0.010	1.498	0.048	0.000	0.000	0.003	0.000	0.000
42X-CC-27-29	118	42.08	33	95		54.82	0.14	1.25	2.27	12.76	0.29	28.21	1.32	0.13	0.01	0.06	0.06	0.02	101.35	0.75	0.19	0.00	79.8	1.943	0.000	0.048	0.000	0.052	0.061	0.378	0.009	1.490	0.050	0.000	0.000	0.002	0.002	0.001
42X-CC-27-29	118	42.08	33	96	r	55.07	0.07	0.74	1.61	14.17	0.37	27.52	1.35	0.13	0.01	0.12	0.00	0.02	101.18	0.73	0.22	0.01	77.6	1.963	0.000	0.029	0.000	0.031	0.043	0.422	0.011	1.462	0.052	0.000	0.000	0.003	0.000	0.001
42X-CC-27-29	118	42.08	35	97	c	54.48	0.14	0.90	1.79	14.57	0.34	26.77	1.61	0.13	0.00	0.09	0.06	0.04	100.92	0.72	0.22	0.01	76.6	1.955	0.000	0.034	0.000	0.038	0.048	0.437	0.010	1.431	0.062	0.000	0.000	0.003	0.002	0.001
42X-CC-27-29	118	42.08	35	98		54.46	0.15	1.06	1.63	14.20	0.37	26.91	1.53	0.14	0.01	0.11	0.15	0.03	100.74	0.72	0.22	0.01	77.2	1.954	0.000	0.041	0.000	0.045	0.044	0.426	0.011	1.439	0.059	0.000	0.000	0.003	0.004	0.001
42X-CC-27-29	118	42.08	35	99		54.15	0.15	1.13	2.15	13.59	0.33	27.14	1.56	0.12	0.00	0.10	0.10	0.03	100.54	0.73	0.21	0.01	78.1	1.944	0.000	0.044	0.000	0.048	0.058	0.408	0.010	1.453	0.060	0.000	0.000	0.003	0.003	0.001
42X-CC-27-29	118	42.08	35	100	r	54.40	0.13	1.15	1.67	13.76	0.29	27.23	1.59	0.12	0.00	0.11	0.07	0.04	100.56	0.73	0.21	0.01	77.9	1.951	0.000	0.045	0.000	0.049	0.045	0.413	0.009	1.455	0.061	0.000	0.000	0.003	0.002	0.001
42X-CC-27-29	118	42.08	70	101		53.18	0.26	0.84	1.87	17.97	0.42	23.94	1.69	0.13	0.00	0.03	0.03	0.02	100.39	0.65	0.28	0.02	70.4	1.952	0.000	0.029	0.000	0.036	0.052	0.552	0.013	1.310	0.066	0.000	0.000	0.001	0.001	0.001
42X-CC-27-29	118	42.08	70	102		53.31	0.16	0.90	1.95	17.80	0.51	23.99	1.73	0.14	0.00	0.07	0.01	0.03	100.61	0.65	0.28	0.01	70.6	1.952	0.000	0.034	0.000	0.039	0.054	0.545	0.016	1.309	0.068	0.000	0.000	0.002	0.000	0.001
42X-CC-27-29	118	42.08	73	72	r	53.63	0.20	0.92	1.78	17.20	0.47	24.54	1.70	0.16	0.00	0.04	0.06	0.04	100.74	0.67	0.27	0.02	71.8	1.954	0.000	0.034	0.000	0.039	0.049	0.524	0.015	1.332	0.066	0.000	0.000	0.001	0.002	0.001
42X-CC-27-29	118	42.08	73	73	r	53.52	0.21	1.06	1.80	18.18	0.50	23.96	1.64	0.14	0.00	0.01	0.09	0.02	101.13	0.65	0.28	0.01	70.1	1.951	0.000	0.040	0.000	0.046	0.049	0.554	0.015	1.302	0.064	0.000	0.000	0.000	0.003	0.001
42X-CC-27-29	118	42.08	76	79		52.72	0.21	0.84	1.68	19.64	0.95	22.42	1.64	0.13	0.00	0.00	0.00	0.02	100.26	0.62	0.32	0.02	67.0	1.956	0.000	0.031	0.000	0.037	0.047	0.610	0.030	1.240	0.065	0.000	0.000	0.000	0.000	0.001
42X-CC-27-29	118	42.08	76	80		52.74	0.20	0.78	1.73	19.65	0.91	22.49	1.65	0.10	0.00	0.00	0.01	0.00	100.26	0.62	0.32	0.02	67.1	1.957	0.000	0.029	0.000	0.034	0.048	0.610	0.029	1.244	0.066	0.000	0.000	0.000	0.000	0.000
42X-CC-27-29	118	42.08	77	86		56.11	0.08	1.73	1.47	7.21	0.16	31.88	1.89	0.11	0.01	0.33	0.08	0.03	101.09	0.82	0.11	0.01	88.7	1.942	0.000	0.056	0.012	0.071	0.038	0.209	0.005	1.644	0.070	0.000	0.000	0.009	0.002	0.001
42X-CC-27-29	118	42.08	77	87		54.43	0.17	0.82	0.95	15.95	0.33	26.01	1.66	0.11	0.01	0.14	0.03	0.05	100.67	0.70	0.25	0.02	74.4	1.965	0.000	0.030	0.000	0.035	0.026	0.482	0.010	1.399	0.064	0.000	0.000	0.004	0.001	0.002
